# Supplementary figures and images for: 1-D Dusty Photo-ionization Models of WR Planetary Nebulae NGC 2452 and IC 2003
Source: Research Square preprint supplement (doi:10.21203/rs.3.rs-1545326/v1), 2022-04-12

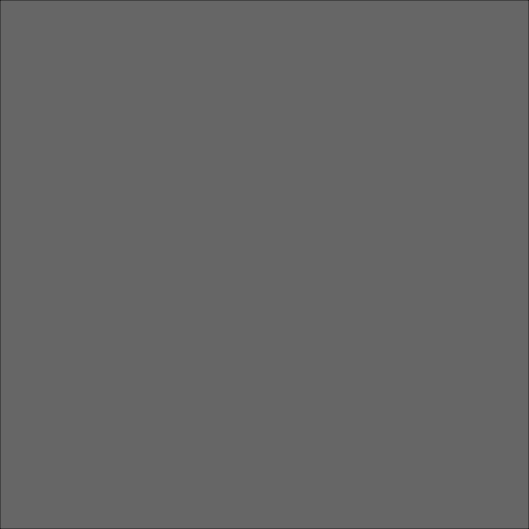

Supplement: Supplementary file 2 [file dc2157ee7987592d06e0f490.zip]
